# Supplementary material for: One-step electrodeposition of MWCNTs-Cu MOF films for the ratiometric electrochemical analysis of glyphosate
Source: Royal Society of Chemistry journal article supplement (doi:10.1039/d4ay00691g), 2024-01-01
Supplement: d4ay00691g1.pdf [file d4ay00691g1.pdf]

# Supporting Information

## **One-step electrodeposition of MWCNTs-Cu MOFs film for the ratiometric electrochemical analysis of glyphosate**

Fan Zhao\*, Dongqing Guo, Jingyue Lan and Yunxi Liu

Tianjin Key Laboratory of Structure and Performance for Functional Molecules,  
College of Chemistry, Tianjin Normal University, Tianjin, 300387, China

\* Corresponding author.

E-mail addresses: fzhao@tjnu.edu.cn

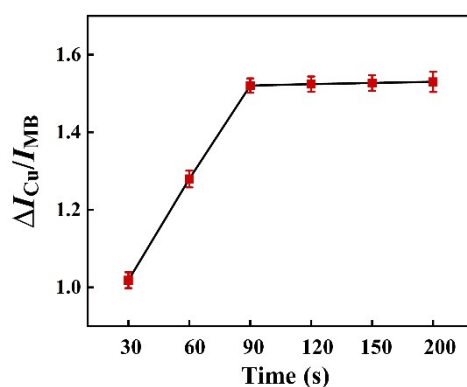

Fig. S1. The relationship between value of  $\Delta I_{Cu}/I_{MB}$  and reaction time obtained at GC/MWCNTs-Cu MOFs/MB electrode in 0.1 M PBS solution (pH=7.0) containing 40 mM  $Cl^-$  in the presence of 10 nM GLYP.

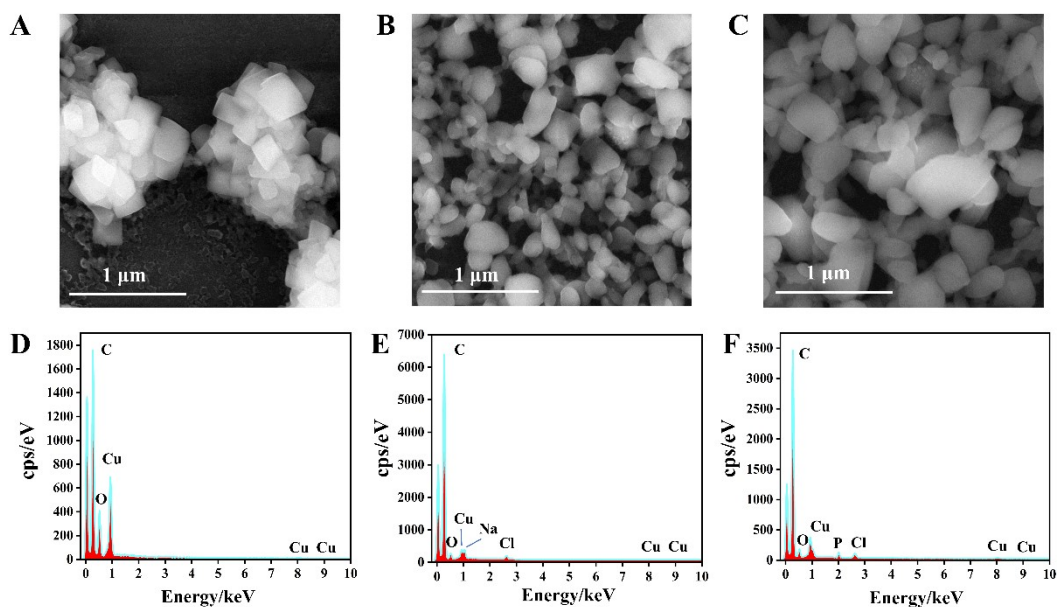

Fig. S2. SEM images and the corresponding EDX of (A, D) GCE/MWCNTs-Cu MOFs with the addition of (B, E)  $Cl^-$  and then adding of (C, F) GLYP.

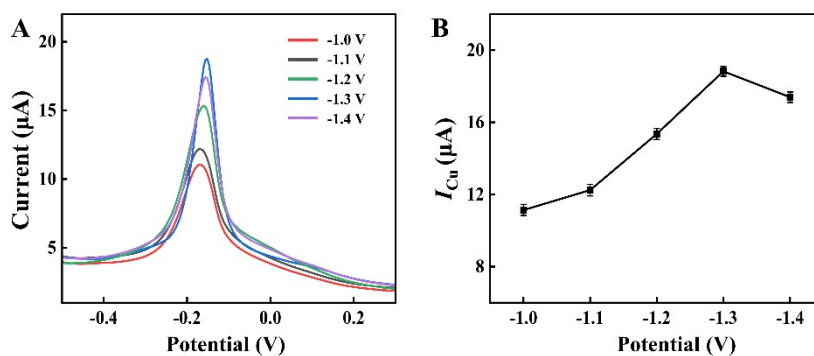

Fig. S3. (A) DPVs of GC/MWCNTs-Cu MOFs modified electrode in 0.1 M PBS (pH=7.0) containing 40 mM  $Cl^-$  under different electrodeposition potentials. (B) The impact of deposition potential on the oxidation peak current of  $I_{Cu}$ .

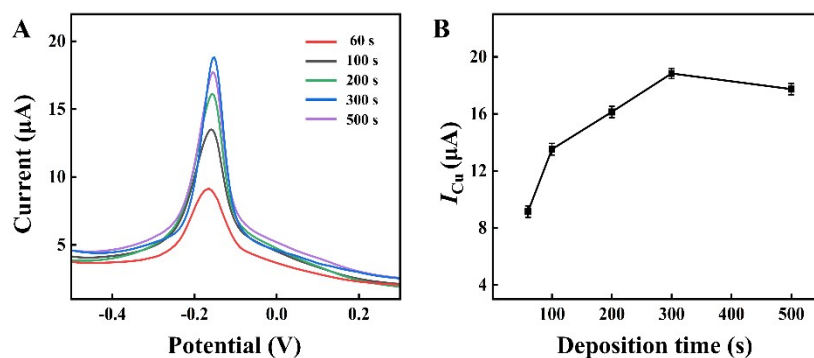

Fig. S4. (A) DPVs obtained at GC/MWCNTs-Cu MOFs modified electrode in 0.1 M PBS (pH=7.0) containing 40 mM  $Cl^-$  under different deposition times. (B) The impact of deposition time on the oxidation peak current of  $I_{Cu}$ .

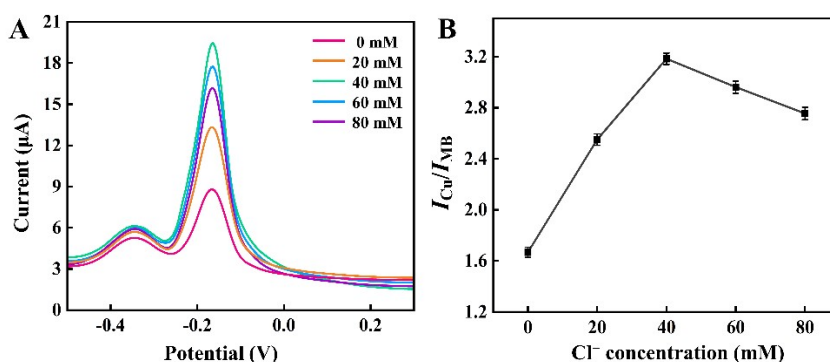

Fig. S5. (A) DPVs of GC/MWCNTs-Cu MOFs/MB electrode in 0.1 M PBS (pH=7.0) containing different  $Cl^-$  concentration of 0 mM, 20 mM, 40 mM, 60 mM, and 80 mM, respectively. (B) The impact of  $Cl^-$  concentration on the oxidation peak current ratio of  $I_{Cu}/I_{MB}$ .

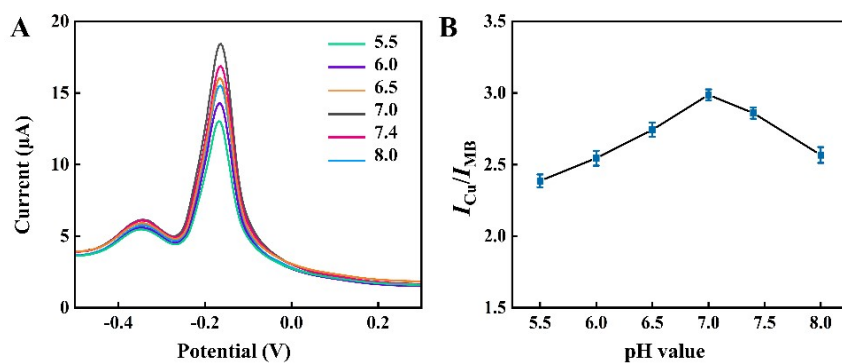

Fig. S6. (A) DPVs of GC/MWCNTs-Cu MOFs/MB electrode in 0.1 M PBS with different pH values. (B) The effect of pH value on the peak current ratio of  $I_{\text{Cu}}/I_{\text{MB}}$ .

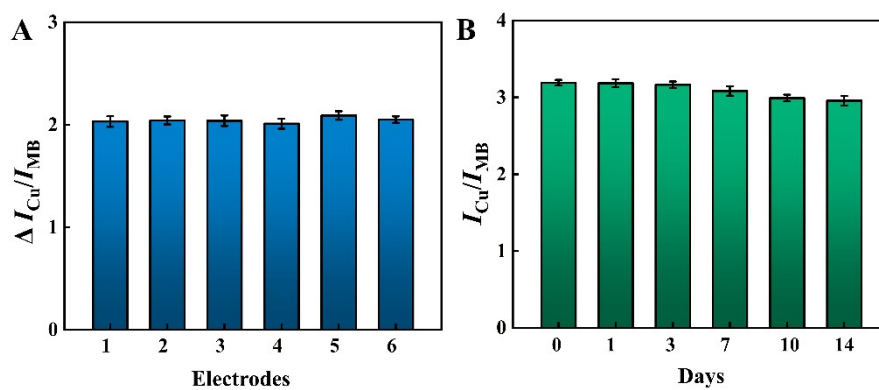

Fig. S7. (A) DPV responses of different GC/MWCNTs-Cu MOFs/MB electrodes towards 50 nM GLYP in 0.1 M PBS (pH=7.0) containing 40 mM  $\text{Cl}^-$ . (B) Stability test for GC/MWCNTs-Cu MOFs/MB.

**Table S1. Comparison of analytical performance of different electrochemical methods for the detection of GLYP.**

| Methods                                 | Linear range (mol L <sup>-1</sup> )         | LOD (mol L <sup>-1</sup> ) | Reference |
|-----------------------------------------|---------------------------------------------|----------------------------|-----------|
| Nanoporous copper (NPC)                 | $3.0 \times 10^{-8} - 6.5 \times 10^{-8}$   | $3.0 \times 10^{-9}$       | [1]       |
| Cu-TCPP/AuNPs/CP                        | $0.2 \times 10^{-6} - 1.2 \times 10^{-4}$   | $0.3 \times 10^{-7}$       | [2]       |
| MIPNs-based electrochemical sensor      | $2.5 \times 10^{-6} - 3.5 \times 10^{-4}$   | $1.9 \times 10^{-6}$       | [3]       |
| graphite oxide paste electrode (GrO-PE) | $1.8 \times 10^{-5} - 1.2 \times 10^{-3}$   | $1.7 \times 10^{-8}$       | [4]       |
| CuAl-LDH/Gr NC                          | $2.96 \times 10^{-9} - 1.18 \times 10^{-6}$ | $1.0 \times 10^{-9}$       | [5]       |
| GC/MWCNTs-Cu MOFs/MB                    | $0.5 \times 10^{-9} - 4.0 \times 10^{-7}$   | $1.4 \times 10^{-11}$      | This work |

**Table S2. Standard methods for GLYP analysis.**

| Method        | Derivatization reagent | Sample preparation | Conditions                                                                                                                                                                                                                                                                                                              | Linear range                                | LOD        | Reference |
|---------------|------------------------|--------------------|-------------------------------------------------------------------------------------------------------------------------------------------------------------------------------------------------------------------------------------------------------------------------------------------------------------------------|---------------------------------------------|------------|-----------|
| LC-ESI-MS/MS  | FMOC-Cl                | SPE                | 2.0×50 mm I.D., Discovery®C18<br>MP : 5 mM HAc/NH <sub>4</sub> Ac (pH 4.8)-ACN<br>Flowrate: 1.0 mL/min                                                                                                                                                                                                                  | 25-5000 ng/L                                | 5 ng/g     | [6]       |
| LC- ESI-MS/MS | FMOC-Cl                | SPE                | 2.0×30 mm I.D., XBridge™ Premier BEH C18<br>MP: 5mM water buffered ammonium acetate (pH 9.0) -MeOH<br>Flowrate: 0.2 mL/min                                                                                                                                                                                              | 0.5-500 ng/L                                | 0.2 ng/L   | [7]       |
| HPLC-FL       | FMOC-Cl                | –                  | 4.6×150 mm I.D., ZORBAX SB-C18<br>MP: 5mmol/L ammonium acetate, pH 9.0 and MeOH<br>Flowrate: 1.0 mL/min                                                                                                                                                                                                                 | 0.8-10 µg/L<br>10-160 µg/L<br>160-6000 µg/L | 0.24 µg/L  | [8]       |
| LC-MS/MS      | –                      | SPE                | 3.0×100 mm I.D., Acclaim™ Trinity Q1<br>MP: 100 % water (A) and 100 % ammoniumformate/formic acid buffer (B)<br>Flowrate: 0.7 mL/min                                                                                                                                                                                    | 10-1000 ng/mL                               | 19 ng/g    | [9]       |
| UHPLC-MS/MS   | FMOC-Cl                | QuEChERS           | 2.1×150 mm I.D., Accucore™ aQ C18 Thermo Scientific<br>MP: 95 % H <sub>2</sub> O, 5 % MeOH, 5 mM NH <sub>4</sub> HCO <sub>2</sub> , 0.1 % CH <sub>2</sub> O <sub>2</sub> (A); 95 % MeOH, 5 % H <sub>2</sub> O, 5 mM NH <sub>4</sub> HCO <sub>2</sub> , 0.1 % CH <sub>2</sub> O <sub>2</sub> (B)<br>Flowrate: 0.3 mL/min | 0.025-10 µg/L                               | 0.025 µg/L | [10]      |

## Reference

- [1] M. Regiart, A. Kumar, J. M. Goncalves, G. J. Silva, J. C. Masini, L. Angnes and M. Bertotti, *ChemElectroChem*, 2020, **7**, 1558-1566.
- [2] R. Jiang, Y.-H. Pang, Q.-Y. Yang, C.-Q. Wan and X.-F. Shen, *Sensor. Actuat. B-Chem.*, 2022, **358**, 131492-131501.
- [3] S. C. Ding, Z. Y. Lyu, S. Q. Li, X. F. Ruan, M. G. Fei, Y. Zhou, X. H. Niu, W. L. Zhu, D. Du and Y. H. Lin, *Biosens. Bioelectron.*, 2021, **191**, 113434-113442.
- [4] J. S. Santos, M. S. Pontes, E. F. Santiago, A. R. Fiorucci and G. J. Arruda, *Sci. Total Environ.*, 2020, **749**, 142385-142394.
- [5] C. Zhang, X. Liang, Y. Lu, H. Li and X. Xu, *Sensors*, 2020, **20**, 4145-4160.
- [6] M. Ibáñez, Ó. J. Pozo, J. V. Sancho, F. J. López and F. Hernández, *J. Chromatogr. A*, 2005, **1081**, 145-155.
- [7] I. Hanke, H. Singer and J. Hollender, *Anal. Bioanal. Chem.*, 2008, **391**, 2265-2276.
- [8] S. Wang, B. Liu, D. Yuan and J. Ma, *Talanta*, 2016, **161**, 700-706.
- [9] N. Chamkasem, *J. Agric. Food Chem.*, 2017, **65**, 7535-7541.
- [10] C. Campanale, M. Triozzi, C. Massarelli and V. F. Uricchio, *J. Chromatogr. A*, 2022, **1672**, 463028-463039.
